# Supplementary material
Source: PubMed Central journal article supplement (PMC3416949)
Supplement: NIHMS378587-supplement-01.pdf [file NIHMS378587-supplement-01.pdf]

**Table S1. Oligonucleotide primers used for expression analysis**

| <b>Primer</b> | <b>Sequence</b>                           | <b>Experiment<sup>a</sup></b> |
|---------------|-------------------------------------------|-------------------------------|
| cE5-F1        | 5'-CAGAACGCGAGAGCAACAGC-3'                | 1, 2                          |
| cE5-R1        | 5'-GGCGTGTTCCTCGAGAAGGC-3'                | 1, 2                          |
| cE5-R2        | 5'-AGATGAAGGAAGGTGCGGAG-3'                | 1, 2                          |
| cE5-Fm        | 5'-TTTGATCCAAGCCTTCTCGAGGAAC-3'           | 3                             |
| cE5-F3        | 5'-CTGGTACAAACATCTATGCC-3'                | 3                             |
| AP            | 5'-GGCCACGCGTCTAGTAC(T) <sub>17</sub> -3' | 3                             |
| RpS7-F        | 5'-GGCGATCATCATCTACGTGC-3'                | 1, 2                          |
| RpS7-R        | 5'-GTAGCTGCTGCAAACCTCGG-3'                | 1, 2                          |

a. (1) RT-PCR on first strand cDNA. (2) One-step RT-PCR. (3) 3'-RACE

**Figure S1.** Sex- and tissue-specific expression profiles of the *An. gambiae* genes encoding cE5 (AGAP008004), apyrase (AGAP011971), salivary peroxidase (AGAP010735) and D7r1 (AGAP008280) as determined by the microarray analysis of Baker et al. (2011). Data reported below were retrieved searching the web server <http://www.tissue-atlas.org/>.

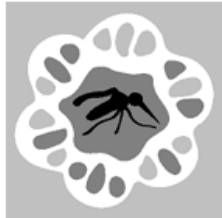

# MozAtlas

## : Browse

- [about](#)
- [browse](#)
- [batch](#)
- [blast](#)
- [orthology](#)
- [summary](#)

Search:

Examples: [Ag.X.196.0\\_CDS\\_at\\_AGAP000040](#)

"mRNA Signal" mRNA abundance in each tissue.

"Present Call" indicates how many of the four arrays for each sample give detectable expression.

"Enrichment Fold" indicates how much higher (or lower) log signal is versus all combined whole fly samples.

"AffyCall" indicates if enrichment is statistically significant ( $p < 0.05$ ).

MozAtlas v1.5 UPDATED: 21/7/2011

Friday, 10-Feb-2012 18:24:42 GMT

Looking for: "AGAP008004" in the database:

PROBE ID: [Ag.3R.12.2\\_s\\_at](#)  
GENE ID: [AGAP008004](#)

| Tissue      | mRNA Signal         |                    | Present Call |   | Enrichment Log2 Fold |        | AffyCall |      |
|-------------|---------------------|--------------------|--------------|---|----------------------|--------|----------|------|
|             | ♀                   | ♂                  | ♀            | ♂ | ♀                    | ♂      | ♀        | ♂    |
| Carcass     | 2620.95 ± 396.596   | 2412.273 ± 167.748 | 4            | 4 | 1.967                | 0.257  | Up       | None |
| Head        | 609.501 ± 68.231    | 464.518 ± 86.767   | 4            | 4 | -0.138               | -2.12  | None     | Down |
| Salivary g. | 13427.546 ± 784.228 | 967.024 ± 269.895  | 4            | 4 | 4.324                | -1.062 | Up       | Down |
| Midgut      | 49.356 ± 4.431      | 300.083 ± 50.401   | 4            | 4 | -3.764               | -2.75  | Down     | Down |
| Malpighian  | 513.091 ± 114.951   | 720.39 ± 162.094   | 4            | 4 | -0.386               | -1.487 | None     | Down |
| Ovary       | 21.037 ± 7.074      | -                  | 3            | - | -4.994               | -      | Down     | -    |
| Testis      | -                   | 595.569 ± 81.27    | -            | 4 | -                    | -1.761 | -        | Down |
| Acps        | -                   | 145.223 ± 39.963   | -            | 4 | -                    | -3.797 | -        | Down |
| Whole body  | 670.624 ± 84.175    | 2018.79 ± 311.018  | 4            | 4 | -                    | -      | -        | -    |

## Looking for: "AGAP011971" in the database:

PROBE ID: [Ag\\_3L.17.0\\_CDS\\_at](#)  
 GENE ID: [AGAP011971](#)

| Tissue      | mRNA Signal          |               | Present Call |   | Enrichment Log2 Fold |   | AffyCall |    |
|-------------|----------------------|---------------|--------------|---|----------------------|---|----------|----|
|             | ♀                    | ♂             | ♀            | ♂ | ♀                    | ♂ | ♀        | ♂  |
| Carcass     | 9.908 ± 4.037        | 5.418 ± 0.042 | 1            | 0 | 0                    | 0 | NA       | NA |
| Head        | 19.221 ± 11.275      | 5.52 ± 0.042  | 2            | 0 | 0                    | 0 | NA       | NA |
| Salivary g. | 17097.232 ± 1584.821 | 7.364 ± 0.694 | 4            | 0 | 8.599                | 0 | Up       | NA |
| Midgut      | 5.689 ± 0.112        | 5.577 ± 0     | 0            | 0 | 0                    | 0 | NA       | NA |
| Malpighian  | 5.573 ± 0.345        | 5.228 ± 0     | 0            | 0 | 0                    | 0 | NA       | NA |
| Ovary       | 6.518 ± 0.013        | -             | 0            | - | 0                    | - | NA       | -  |
| Testis      | -                    | 5.128 ± 0.016 | -            | 0 | -                    | 0 | -        | NA |
| Acps        | -                    | 7.003 ± 0.089 | -            | 0 | -                    | 0 | -        | NA |
| Whole body  | 44.105 ± 9.502       | 6.32 ± 0.165  | 4            | 0 | -                    | - | -        | -  |

## Looking for: "AGAP008280" in the database:

PROBE ID: [Ag\\_3R.59.0\\_CDS\\_at](#)  
 GENE ID: [AGAP008280](#)

| Tissue      | mRNA Signal      |                | Present Call |   | Enrichment Log2 Fold |   | AffyCall |    |
|-------------|------------------|----------------|--------------|---|----------------------|---|----------|----|
|             | ♀                | ♂              | ♀            | ♂ | ♀                    | ♂ | ♀        | ♂  |
| Carcass     | 5.877 ± 0        | 6.381 ± 0.465  | 0            | 0 | 0                    | 0 | NA       | NA |
| Head        | 11.457 ± 0.991   | 9.59 ± 0.544   | 1            | 0 | 0                    | 0 | NA       | NA |
| Salivary g. | 2563.578 ± 70.29 | 12.646 ± 1.359 | 4            | 1 | 8.459                | 0 | Up       | NA |
| Midgut      | 5.324 ± 0.046    | 5.278 ± 0      | 0            | 0 | 0                    | 0 | NA       | NA |
| Malpighian  | 5.729 ± 0.485    | 5.236 ± 0.004  | 0            | 0 | 0                    | 0 | NA       | NA |
| Ovary       | 5.187 ± 0        | -              | 0            | - | 0                    | - | NA       | -  |
| Testis      | -                | 7.853 ± 0      | -            | 0 | -                    | 0 | -        | NA |
| Acps        | -                | 6.428 ± 0.336  | -            | 0 | -                    | 0 | -        | NA |
| Whole body  | 7.286 ± 0.276    | 6.811 ± 0.152  | 0            | 0 | -                    | - | -        | -  |

## Looking for: "AGAP010735" in the database:

PROBE ID: [Ag\\_3L.638.0\\_CDS\\_at](#)  
 GENE ID: [AGAP010735](#)

| Tissue      | mRNA Signal          |               | Present Call |   | Enrichment Log2 Fold |   | AffyCall |    |
|-------------|----------------------|---------------|--------------|---|----------------------|---|----------|----|
|             | ♀                    | ♂             | ♀            | ♂ | ♀                    | ♂ | ♀        | ♂  |
| Carcass     | 8.146 ± 1.864        | 5.355 ± 0.064 | 1            | 0 | 0                    | 0 | NA       | NA |
| Head        | 30.237 ± 12.817      | 6.711 ± 0.041 | 3            | 0 | -0.762               | 0 | None     | NA |
| Salivary g. | 16887.781 ± 1445.617 | 6.541 ± 0.917 | 4            | 0 | 8.363                | 0 | Up       | NA |
| Midgut      | 5.309 ± 0.002        | 5.306 ± 0     | 1            | 0 | 0                    | 0 | NA       | NA |
| Malpighian  | 12.573 ± 7.343       | 5.236 ± 0     | 1            | 0 | 0                    | 0 | NA       | NA |
| Ovary       | 5.336 ± 0.129        | -             | 0            | - | 0                    | - | NA       | -  |
| Testis      | -                    | 5.097 ± 0.002 | -            | 0 | -                    | 0 | -        | NA |
| Acps        | -                    | 5.307 ± 0.011 | -            | 0 | -                    | 0 | -        | NA |
| Whole body  | 51.277 ± 8.627       | 6.922 ± 0.032 | 4            | 0 | -                    | - | -        | -  |

PROBE ID: [Ag\\_3L.1742.1\\_s\\_at](#)  
 GENE ID: [AGAP010735](#)

| Tissue      | mRNA Signal          |               | Present Call |   | Enrichment Log2 Fold |   | AffyCall |    |
|-------------|----------------------|---------------|--------------|---|----------------------|---|----------|----|
|             | ♀                    | ♂             | ♀            | ♂ | ♀                    | ♂ | ♀        | ♂  |
| Carcass     | 10.158 ± 4.319       | 5.31 ± 0      | 1            | 0 | 0                    | 0 | NA       | NA |
| Head        | 20.577 ± 6.296       | 5.548 ± 0.173 | 3            | 0 | -1.644               | 0 | Down     | NA |
| Salivary g. | 14481.531 ± 1399.842 | 6.337 ± 0.894 | 4            | 0 | 7.815                | 0 | Up       | NA |
| Midgut      | 5.281 ± 0.006        | 5.276 ± 0     | 0            | 0 | 0                    | 0 | NA       | NA |
| Malpighian  | 18.483 ± 13.265      | 5.218 ± 0     | 1            | 0 | 0                    | 0 | NA       | NA |
| Ovary       | 5.187 ± 0            | -             | 0            | - | 0                    | - | NA       | -  |
| Testis      | -                    | 5.095 ± 0     | -            | 0 | -                    | 0 | -        | NA |
| Acps        | -                    | 5.289 ± 0     | -            | 0 | -                    | 0 | -        | NA |
| Whole body  | 64.289 ± 7.617       | 5.245 ± 0.097 | 4            | 0 | -                    | - | -        | -  |

PROBE ID: [Ag\\_3L.1742.0\\_CDS\\_at](#)  
 GENE ID: [AGAP010735](#)

| Tissue      | mRNA Signal        |               | Present Call |   | Enrichment Log2 Fold |   | AffyCall |    |
|-------------|--------------------|---------------|--------------|---|----------------------|---|----------|----|
|             | ♀                  | ♂             | ♀            | ♂ | ♀                    | ♂ | ♀        | ♂  |
| Carcass     | 6.188 ± 0.949      | 5.247 ± 0.008 | 0            | 0 | 0                    | 0 | NA       | NA |
| Head        | 7.462 ± 1.365      | 5.456 ± 0.031 | 1            | 0 | 0                    | 0 | NA       | NA |
| Salivary g. | 3627.104 ± 516.332 | 5.367 ± 0.089 | 4            | 0 | 8.389                | 0 | Up       | NA |
| Midgut      | 5.524 ± 0.248      | 5.276 ± 0     | 0            | 0 | 0                    | 0 | NA       | NA |
| Malpighian  | 6.097 ± 0.879      | 5.218 ± 0     | 1            | 0 | 0                    | 0 | NA       | NA |
| Ovary       | 5.187 ± 0          | -             | 0            | - | 0                    | - | NA       | -  |
| Testis      | -                  | 5.095 ± 0     | -            | 0 | -                    | 0 | -        | NA |
| Acps        | -                  | 5.275 ± 0     | -            | 0 | -                    | 0 | -        | NA |
| Whole body  | 10.818 ± 1.497     | 5.678 ± 0.108 | 0            | 0 | -                    | - | -        | -  |

**Figure S2.** The 3'UTR of the longest *cE5* mRNA isoform (*cE5L<sub>950</sub>*) with the potential binding sites for aga-miR-989 and aga-miR-981 (in blue) are shown. Polyadenylation signals AAUAAA are highlighted in red. The 99 nt region corresponding to a small exon of gene AGAP008003 encoded on the other DNA strand is highlighted in yellow.

```
UUGCAGGAGCAUCAAUAUGUUAUAUCACGGAAUAUGUAGAACGCAUUUAAGCAUCAAAUAAAAUUACAGAAACGGUAUUA   80
  | | | | | | | | | | | | | | | | | | | |
  cauggug-augcaguguagugu (aga-miR-989)

CACCUAGUCCAUCAGUUCGAUGAGCUCUUUGUACAACAAAAUUGGCUUGAAGGAAUAACAACACAACAGACACUGGUA   160
CAAAACAUCUAUGCCCUAACUUACCCUUACCGGUUUCGCGACAUUUUUCACGACGCUUUCAGCUUUGCCUGCACCUUGG   240
  | | | | | | | | | | | | | | | | | | | |
  guccaaagcagcugu-----ugcuu (aga-miR-981)

UUUGCACAUUCUCCGCACCUCCUUCUACAUCUUAGCAAGGAUACCUUUACGCCGCAAAGAAAUGUACCAAACAACAUAGAGU   320
AUACUGCGCAAACAUAUUUGCUGAUUGCUAAGAAAUAAGGAAUUAAUAAAUUUUAUUUUAUAGGGACAACAAAUGCA   400
ACAUUCUAACUAGCUAUACAAUGAAAAGCAUAACAUAUAAUACACAUUCAAUAAACCACAGCUUCUAGUUUCCCAAUUAU   480
GAUUGCAAUACG 492
```

**Figure S3. (A)** Map of the genomic region encoding AGAP008004 (*cE5*) and AGAP008003 genes. Coding regions are shown as red boxes, 5'UTRs and 3'UTR as empty boxes, red lines mark introns. The arrowhead points to exon 10 of AGAP008003, which corresponds to the 3'UTR of the *cE5L* mRNAs. The map was obtained by VectorBase (<http://www.vectorbase.org>). **(B)** Sex- and tissue-specific expression profile of the *An. gambiae* AGAP008003 gene as determined by the microarray analysis of Baker et al. (2011). Data retrieved searching the web server <http://www.tissue-atlas.org/>.

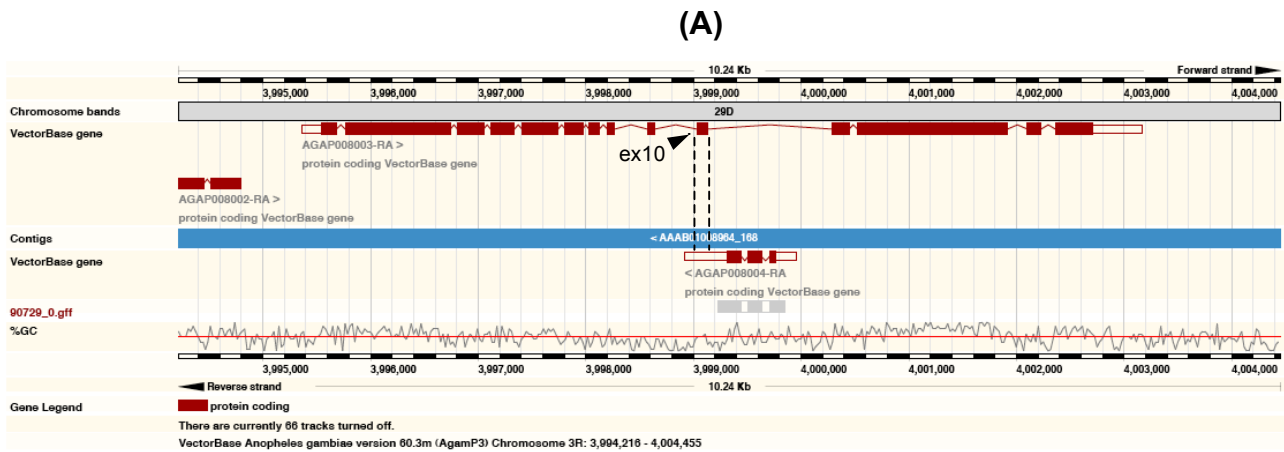

**(B)**

### Looking for: "AGAP008003" in the database:

PROBE ID: [Ag\\_3R\\_930.0\\_CDS\\_at](#)  
GENE ID: [AGAP008003](#)

| Tissue      | mRNA Signal        |                 | Present Call |   | Enrichment Log2 Fold |        | AffyCall |      |
|-------------|--------------------|-----------------|--------------|---|----------------------|--------|----------|------|
|             | ♀                  | ♂               | ♀            | ♂ | ♀                    | ♂      | ♀        | ♂    |
| Carcass     | 30.506 ± 3.564     | 54.685 ± 4.725  | 3            | 4 | -0.826               | 0.214  | Down     | None |
| Head        | 10.028 ± 0.685     | 10.924 ± 0.961  | 1            | 2 | 0                    | 0      | NA       | NA   |
| Salivary g. | 1540.831 ± 228.856 | 14.634 ± 2.646  | 4            | 3 | 4.832                | -1.688 | Up       | Down |
| Midgut      | 5.323 ± 0.004      | 5.423 ± 0.061   | 0            | 0 | 0                    | 0      | NA       | NA   |
| Malpighian  | 11.756 ± 1.152     | 10.213 ± 1.658  | 1            | 1 | 0                    | 0      | NA       | NA   |
| Ovary       | 26.194 ± 14.462    | -               | 2            | - | 0                    | -      | NA       | -    |
| Testis      | -                  | 264.87 ± 17.339 | -            | 4 | -                    | 2.49   | -        | Up   |
| Acps        | -                  | 7.204 ± 0.029   | -            | 1 | -                    | 0      | -        | NA   |
| Whole body  | 54.092 ± 7.597     | 47.143 ± 10.467 | 4            | 4 | -                    | -      | -        | -    |

PROBE ID: [Ag\\_3R\\_1187.0\\_CDS\\_at](#)  
GENE ID: [AGAP008003](#)

| Tissue      | mRNA Signal   |               | Present Call |   | Enrichment Log2 Fold |        | AffyCall |      |
|-------------|---------------|---------------|--------------|---|----------------------|--------|----------|------|
|             | ♀             | ♂             | ♀            | ♂ | ♀                    | ♂      | ♀        | ♂    |
| Carcass     | 6.692 ± 0.353 | 7.028 ± 0.097 | 2            | 4 | 0                    | -0.334 | NA       | None |
| Head        | 7.503 ± 1.04  | 7.21 ± 0.23   | 3            | 3 | 0.307                | -0.297 | None     | None |
| Salivary g. | 6.145 ± 0.203 | 5.931 ± 0     | 2            | 0 | 0                    | 0      | NA       | NA   |
| Midgut      | 5.276 ± 0     | 5.295 ± 0.02  | 0            | 0 | 0                    | 0      | NA       | NA   |
| Malpighian  | 5.269 ± 0.051 | 5.229 ± 0.01  | 0            | 0 | 0                    | 0      | NA       | NA   |
| Ovary       | 6.163 ± 0.002 | -             | 0            | - | 0                    | -      | NA       | -    |
| Testis      | -             | 7.401 ± 0     | -            | 2 | -                    | 0      | -        | NA   |
| Acps        | -             | 5.315 ± 0.006 | -            | 1 | -                    | 0      | -        | NA   |
| Whole body  | 6.066 ± 0.311 | 8.86 ± 1.37   | 2            | 4 | -                    | -      | -        | -    |

**Figure S4.** Alignment of the *An. gambiae* cE5 to the *An. albimanus* anophelin. The alignment was obtained using the ClustalW2 Multiple Sequence Alignment program at the EBI website (<http://www.ebi.ac.uk/Tools/msa/clustalw2/>). Signal peptides are boxed and highlighted in green. Potential O-glycosylation sites, as predicted by the NetOGlyc 3.1 server (Julenius et al., 2005; <http://www.cbs.dtu.dk/services/NetOGlyc/>) are highlighted in orange. Identities (\*), conservative (:), and semiconservative (.) substitutions are marked.

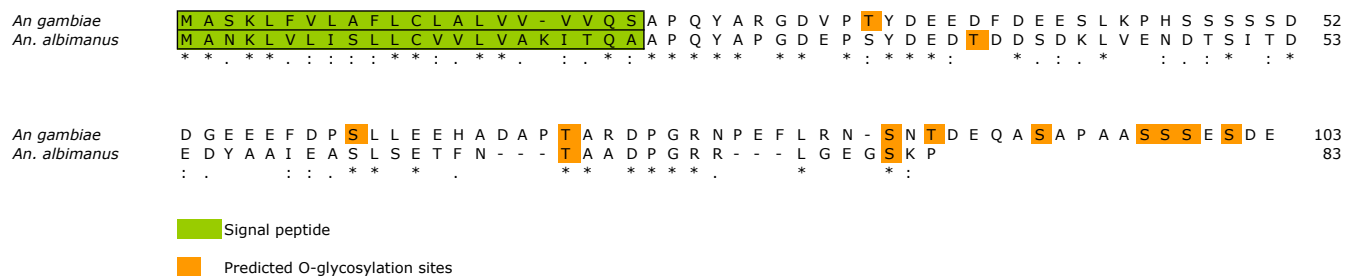

## Supplementary material and methods

### 1. Serine protease inhibition assays: enzymes, buffers and substrates.

The **source and concentration of the enzymes** used in the serine protease screen was as follows:

- Thrombin (0.03 nM),  $\alpha$ -chymotrypsin (0.075 nM), plasmin (0.4 nM) and chymase (0.9 nM) were purchased from Sigma (St. Louis, MO);
- skin  $\beta$ -tryptase (0.01nM) was purchased from Promega (Madison, WI);
- activated coagulation factor X (FXa) (0.1nM) was purchased from EMD Biosciences (La Jolla, CA);
- FXIIa (0.1 nM) was purchased from Haematologic Technologies Inc. (Essex Junction, VT);
- kallikrein (0.04nM) was purchased from Fitzgerald Industries International (Concord, MA);
- elastase (0.18nM) was purchased from Elastin Products (Owensville, MO);
- FXIa (0,06 nM) and tissue plasminogen activator (t-PA) (0.06 nM) from Molecular Innovations (Southfield, MI);
- matriptase (0.1 nM) from R&D Systems (Minneapolis, MN);
- cathepsin G (6.7 nM) from Enzo Life Sciences (Plymouth Meeting, PA);
- sequencing grade trypsin (0.1 nM) was purchased from Roche (Chicago, IL).

The **assay buffers** were as follows:

- 1) elastase and chymase, 50 mM Hepes buffer pH 7.4, 100 mM NaCl, 0.01% Triton X-100;
- 2) trypsin,  $\alpha$ -chymotrypsin, factor XIa, factor XIIa and thrombin, 50 mM Tris buffer pH 8.0, 150 mM NaCl, 20 mM CaCl<sub>2</sub>, 0.01% Triton X-100;
- 3)  $\beta$ -tryptase, 50 mM Tris pH 8.0, 50 mM NaCl, 0.05% Triton X-100;
- 4) kallikrein and matriptase, 20 mM Tris buffer pH 8.5, 150 mM NaCl, 0.02% triton X-100;
- 5) factor Xa, 20 mM Tris buffer pH 8.0, 200 mM NaCl, 5 mM CaCl<sub>2</sub>, 0.1% BSA;
- 6) t-PA, 20 mM Tris buffer pH 8.5, 0.05% Triton X-100;
- 7) cathepsin G, 50 mM Tris buffer pH 7.4, 150 mM NaCl, 0.01% Triton X-100;
- 8) plasmin, 50mM Tris pH 8, 150 mM NaCl, 0.01% Triton X-100.

The **substrates and sources** were as follows:

- Suc-Ala-Ala-Pro-Val-AMC for elastase; Boc-Asp-Pro-Arg-AMC for thrombin and plasmin; Boc-Gln-Ala-Arg-AMC for trypsin and factor XIa (Sigma, St. Louis, MO);
- Boc-Phe-Ser-Arg-AMC for  $\beta$ -tryptase; Suc-Leu-Leu-Val-Tyr-AMC for chymase (Bachem, King of Prussia, PA);
- Suc-Ala-Ala-Pro-Val-AMC for  $\alpha$ -chymotrypsin and chymase (EMD Biosciences, La Jolla, CA);
- methylsulfonyl-D-cyclohexylalanyl-Gly-Arg-AMC acetate for factor Xa, factor XIIa, t-PA, matriptase and kallikrein (American Diagnostica Inc., Stamford, CT).
